# Supplementary material
Source: Springer Nature journal article supplement (https://www.springermedizin.de/resource/supplementary/13584_2011_22_MOESM3_ESM.pdf/9676806)

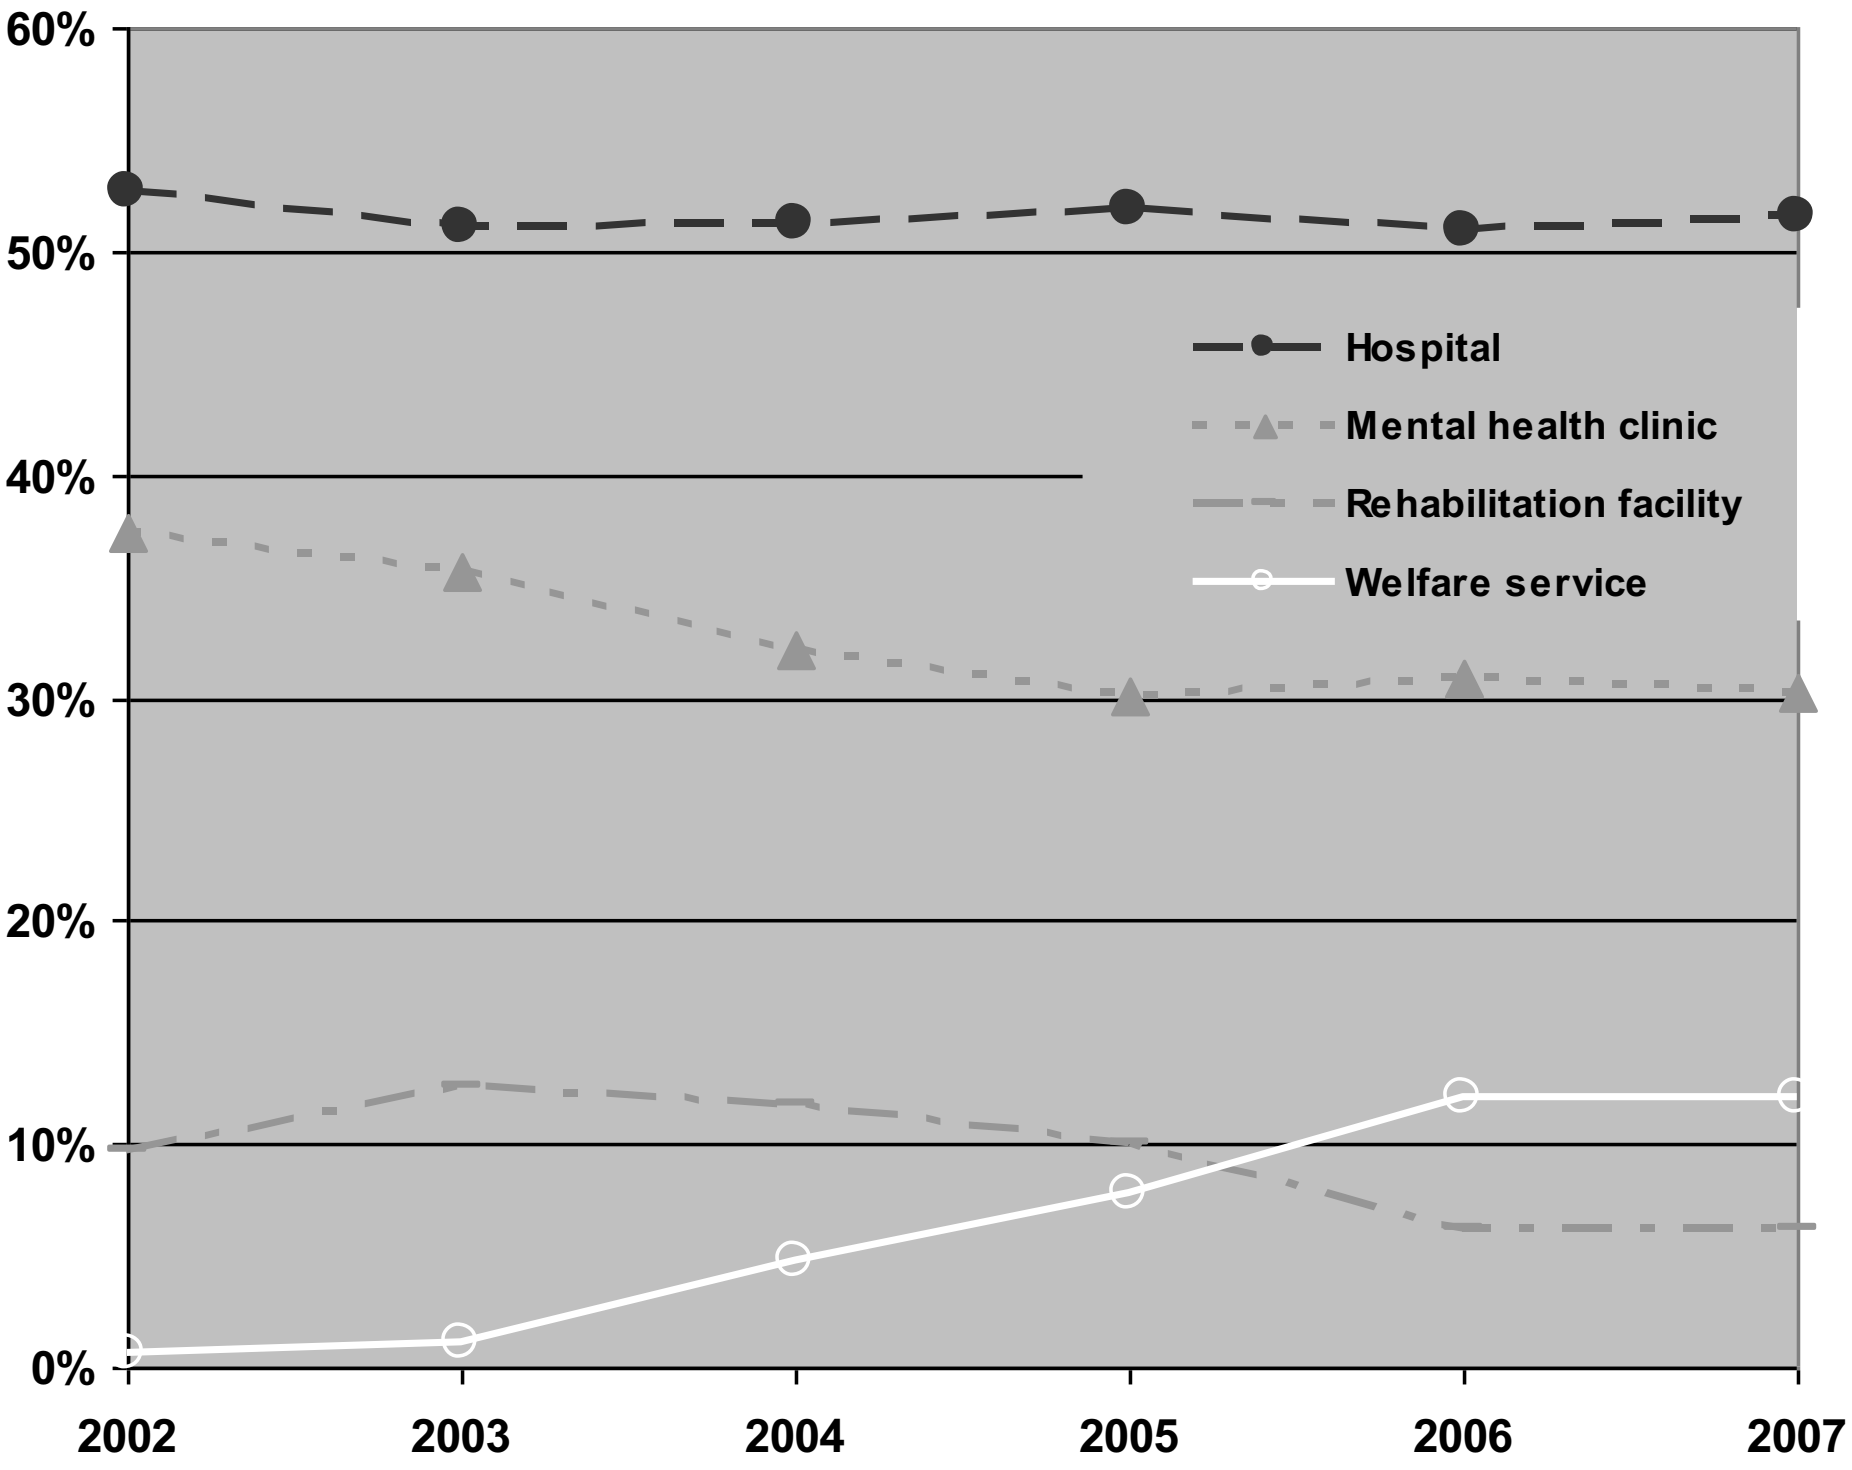

Year\* of application of the patients for rehabilitation facilities

Supplement: MOESM3 [file 9676806]
